# Supplementary material
Source: PubMed Central journal article supplement (PMC2754635)
Supplement: pp.109.140806_2.pdf [file pp.109.140806_2.pdf]

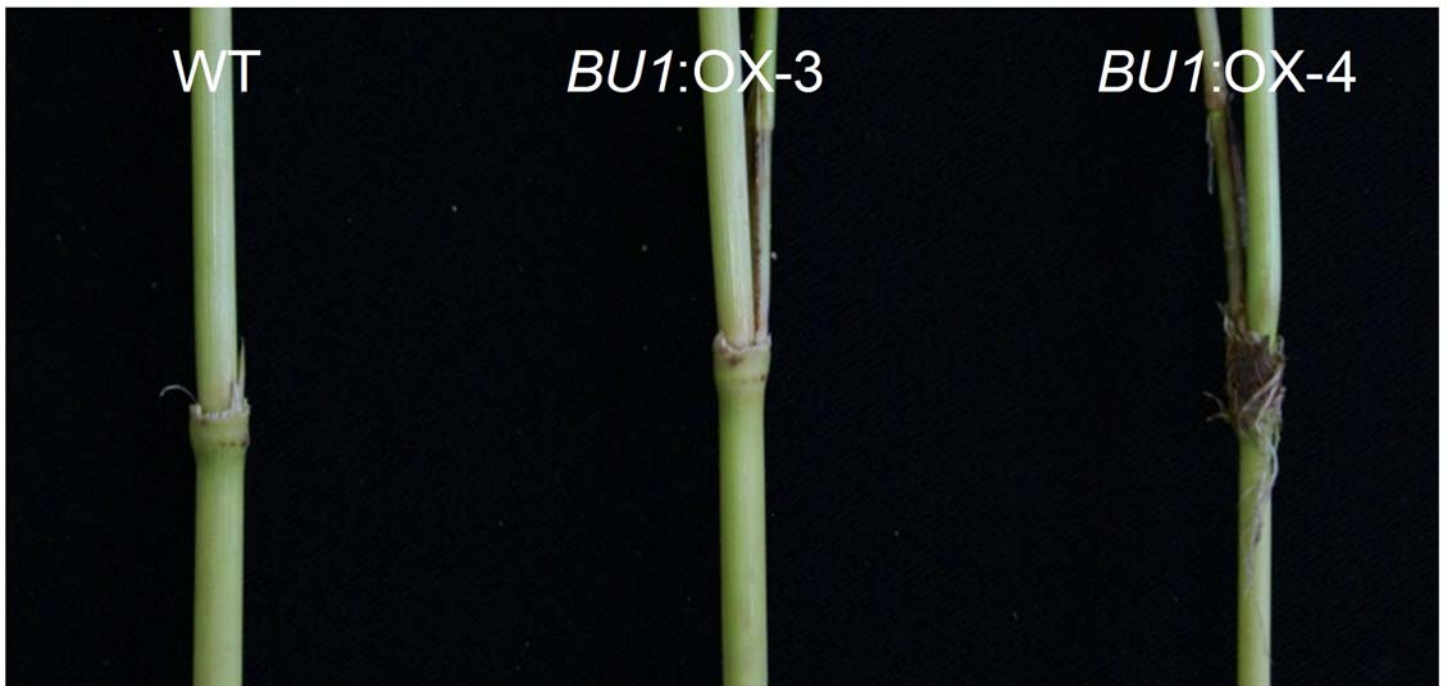

**Supplemental Figure S2.** Close-up view of third node of culm in WT, *BU1:OX-3,4*. Severe lignification and development of crown roots was observed in OX-4.
